# Supplementary material
Source: PubMed Central journal article supplement (PMC8064588)
Supplement: NIHMS1690732-supplement-Supp_Fig__2.pdf [file NIHMS1690732-supplement-Supp_Fig__2.pdf]

# Supplementary Figure 2

**A**

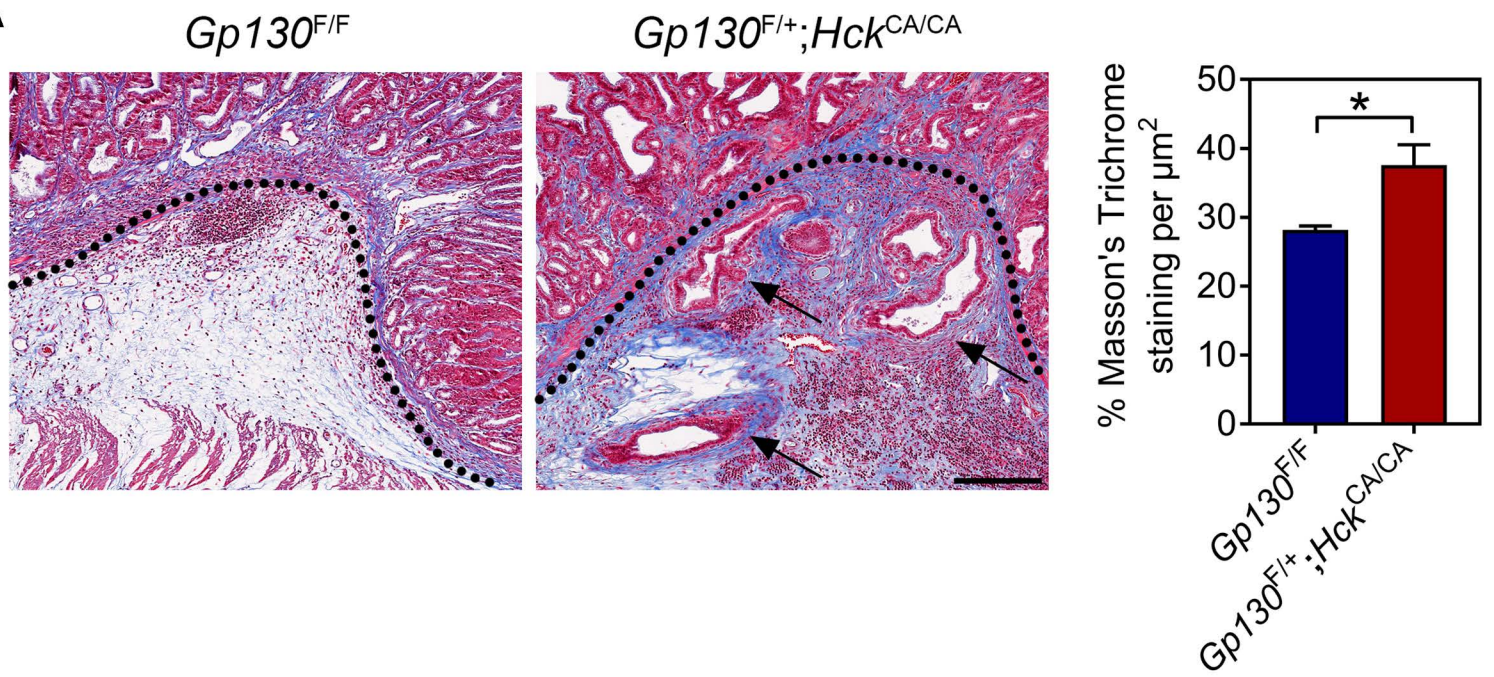

**B**

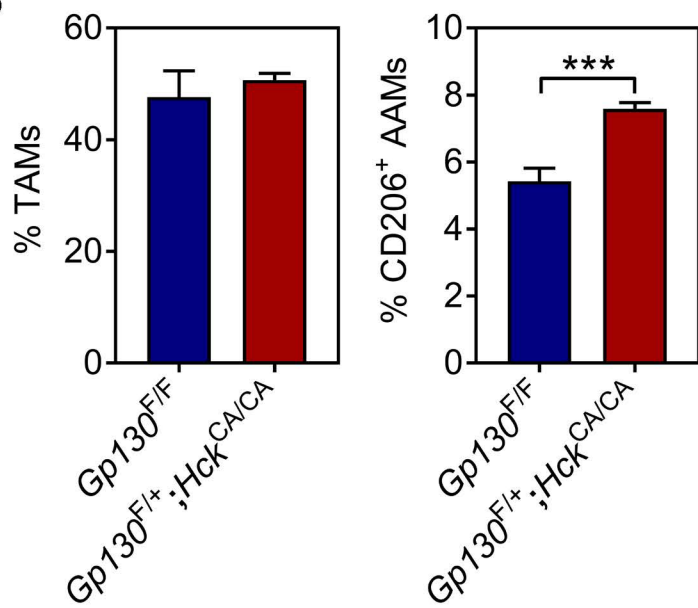

**C**

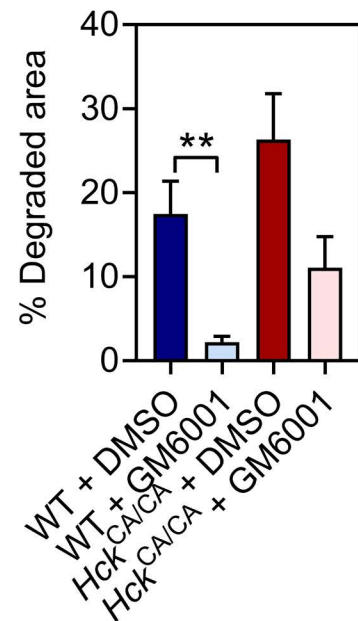

**D**

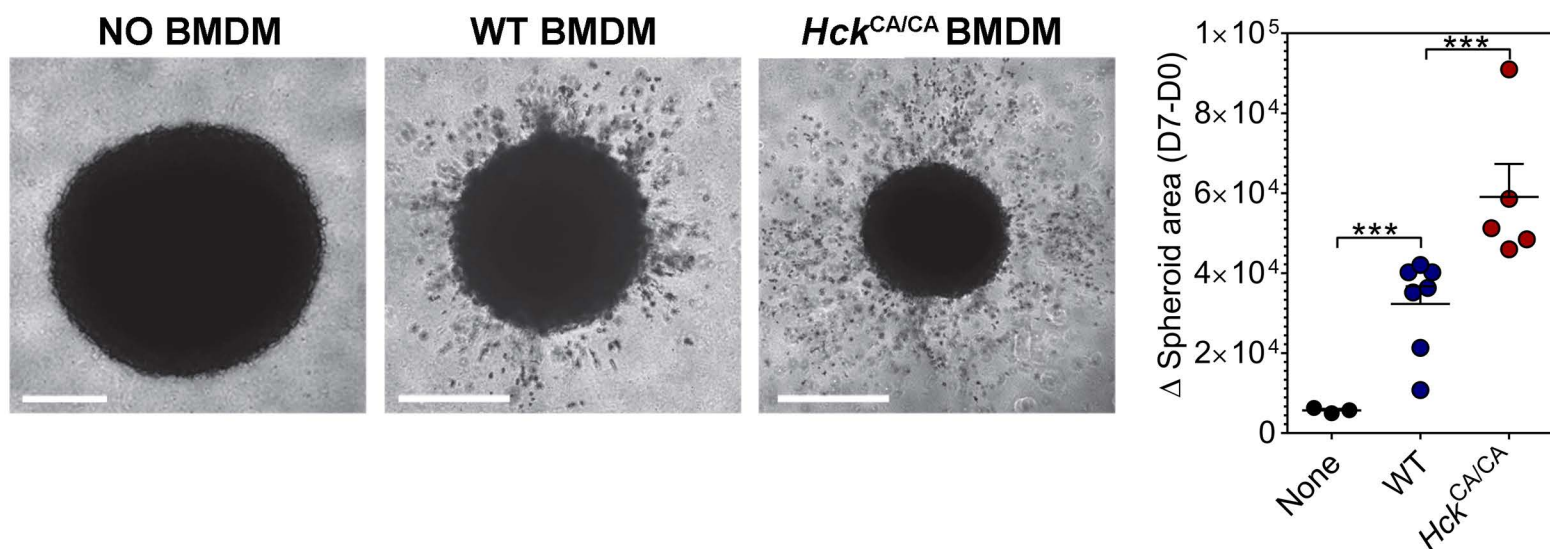

**Supplementary Figure 2. Increased HCK activity in BMDMs supports tumor cell invasion *in vitro*.**

*This figure relates to Figure 2.*

**(A)** Representative Masson's Trichrome staining of tumors collected from *Gp130<sup>F/F</sup>* and *Gp130<sup>F/+</sup>;Hck<sup>CA/CA</sup>* mice at 1-year of age. Blue staining indicates collagen deposition. Arrows indicate tumor epithelial cells that have invaded through the tumor stroma boundary (dotted line). Scale bar: 200 $\mu$ m. Quantification of Masson's Trichrome staining at the tumor stroma boundary is also shown.  $n \geq 3$  mice per cohort.

**(B)** Flow cytometry quantification of TAMs (%F480<sup>+</sup> of CD45<sup>+</sup>CD11b<sup>+</sup>Ly6G<sup>-</sup>Ly6C<sup>-</sup>SiglecF<sup>-</sup> cells) and CD206<sup>+</sup> alternatively-activated macrophages (AAMs; %F480<sup>+</sup>CD206<sup>+</sup> of CD45<sup>+</sup>CD11b<sup>+</sup>Ly6G<sup>-</sup>Ly6C<sup>-</sup>SiglecF<sup>-</sup> cells) in tumors of 1-year-old *Gp130<sup>F/F</sup>* and *Gp130<sup>F/+</sup>;Hck<sup>CA/CA</sup>* mice.  $n=3$  mice per cohort.

**(C)** Invasion of WT and *Hck<sup>CA/CA</sup>* BMDMs through a Cy3-conjugated gelatin matrix. Where indicated, cells were treated with DMSO (0.05%) or 5 $\mu$ M GM6001.

**(D)** Representative images of tumor spheroids infiltrated with either WT or *Hck<sup>CA/CA</sup>* BMDMs at Day 7. Scale bar: 100 $\mu$ m. Quantification of changes in tumor spheroid area ( $\Delta$ ) at Day 7 compared to Day 0 is also shown, y-axis represents change in area expressed as square pixels.

Data represents mean  $\pm$  SEM, p-values from unpaired Student's T-test \* $p < 0.05$ ,

\*\* $p < 0.01$ , \*\*\* $p < 0.001$
