# Supplementary material
Source: PubMed Central journal article supplement (PMC8064588)
Supplement: NIHMS1690732-supplement-Supp_Fig__3.pdf [file NIHMS1690732-supplement-Supp_Fig__3.pdf]

# Supplementary Figure 3

**A**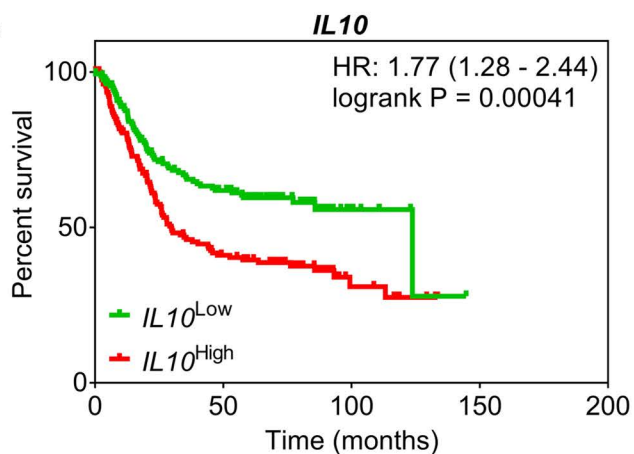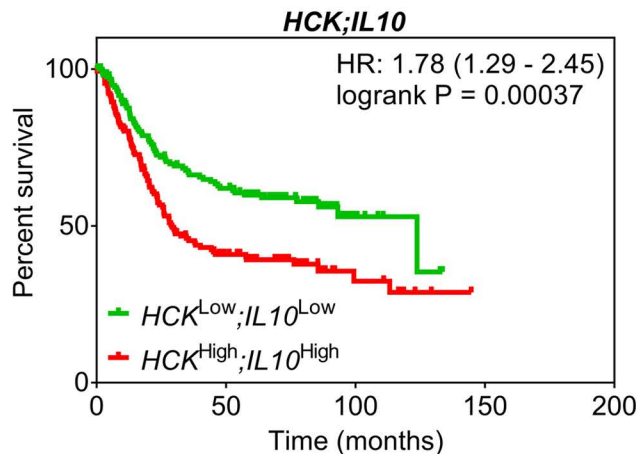**B**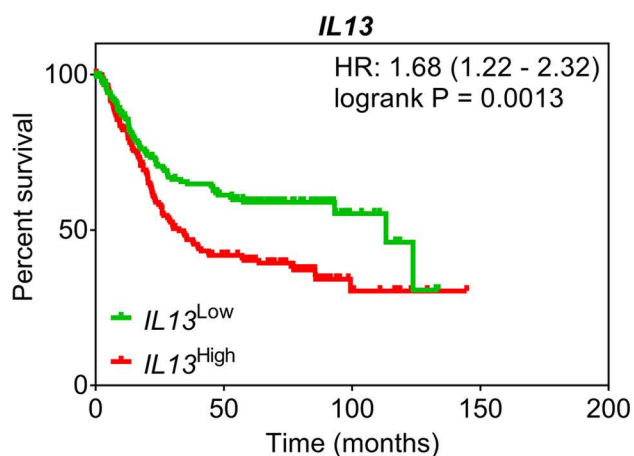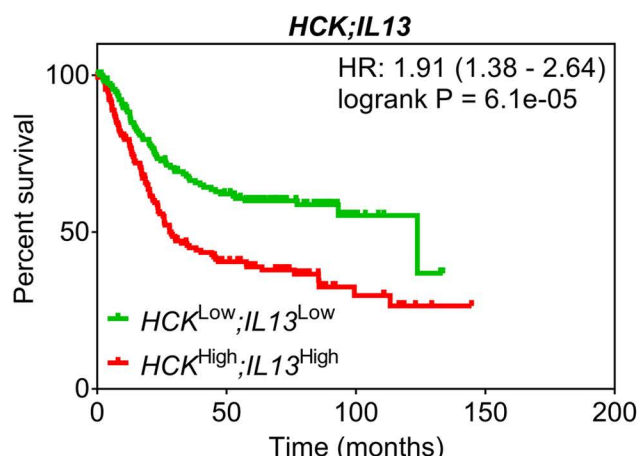**C**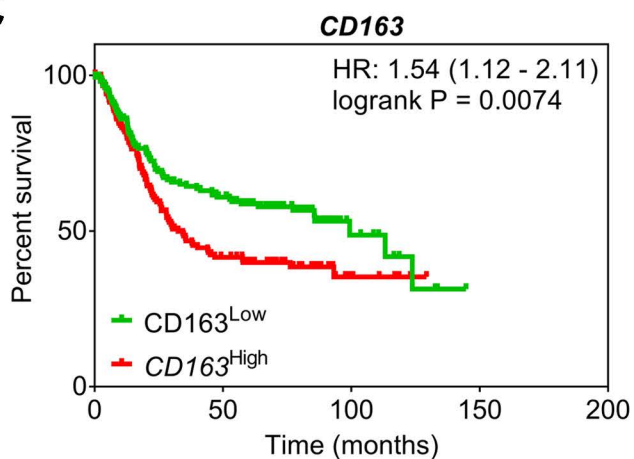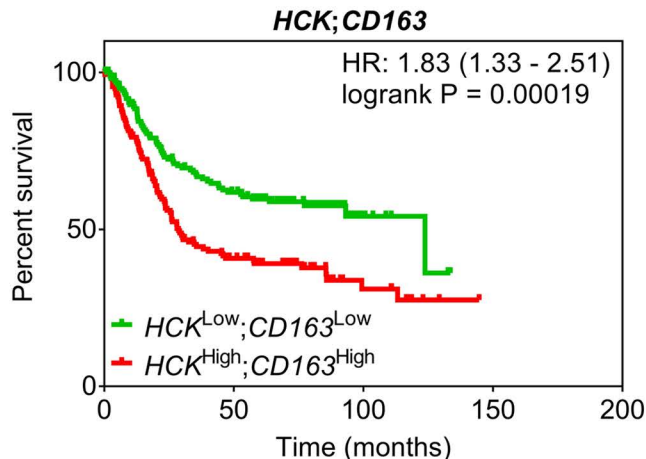**D**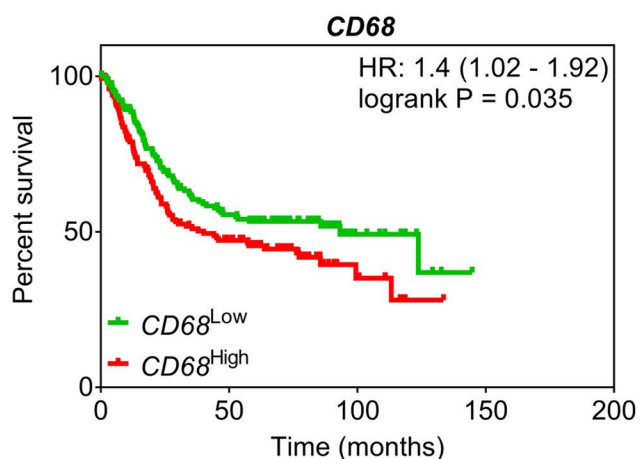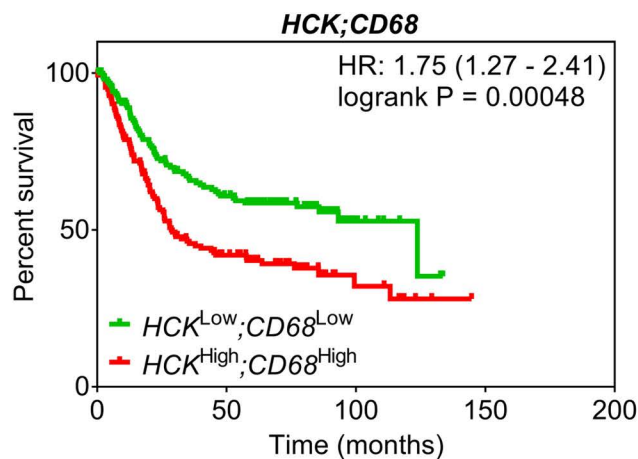

**Supplementary Figure 3. Increased expression of genes associated with alternative macrophage polarization confers a poorer overall survival in human intestinal-type gastric cancer patients.**

*This figure relates to Figure 3.*

Overall survival analysis of **(A)** *IL10* and *HCK;IL10*, **(B)** *IL13* and *HCK;IL13*, **(C)** *CD163* and *HCK;CD163* and **(D)** *CD68* and *HCK;CD68* high vs. low-expressing intestinal-type gastric cancer patients (n=320) stratified at the median level of gene expression from the manually curated KM-plot database [17].
