# Supplementary material
Source: PubMed Central journal article supplement (PMC8064588)
Supplement: NIHMS1690732-supplement-Supp_Table_1.pdf [file NIHMS1690732-supplement-Supp_Table_1.pdf]

**Supplementary Table 1 – Antibodies**

| <b>Antibodies</b>                             | <b>Source</b>       | <b>Catalog #</b> | <b>Clone</b> | <b>Dilution</b> |
|-----------------------------------------------|---------------------|------------------|--------------|-----------------|
| IRDye goat anti-rabbit secondary antibody     | LICOR Bio-sciences  | 926-32221        | -            | 1:10000         |
| IRDye goat anti-mouse secondary antibody      | LICOR Bio-sciences  | 926-32210        | -            | 1:10000         |
| Goat anti-rat biotinylated secondary antibody | Vector Laboratories | BA-9400          | -            | 1:200           |
| Mouse anti-mouse Actin                        | Sigma               | A228             | AC-74        | 1:1000          |
| Rabbit anti-mouse p-STAT3 (Tyr-705)           | Cell Signaling      | 9145             | D3A7         | 1:1000          |
| Rabbit anti-mouse STAT3                       | Cell Signaling      | 4904             | 79D7         | 1:1000          |
| Rat anti-mouse F4/80                          | Abcam               | 6640             | Cl:A3-1      | 1:200           |
| APC-Cy7 rat anti-mouse CD45.2                 | Biolegend           | 103116           | 30-F11       | 1:200           |
| FITC rat anti-mouse F4/80                     | Biolegend           | 123108           | BM8          | 1:200           |
| PE rat anti-mouse CD11b                       | BD Biosciences      | 553311           | M1/70        | 1:200           |
| PerCP-Cy5.5 rat anti-mouse Ly6G               | BD Biosciences      | 560602           | 1A8          | 1:200           |
| eFluor450 rat anti-mouse Ly6C                 | ThermoFisher        | 48-5932-82       | HK1.4        | 1:200           |
| APC rat anti-mouse CD206                      | BioLegend           | 141708           | C068C2       | 1:200           |
| PE-CF594 rat anti-mouse SiglecF               | BD Biosciences      | 562757           | E50-2440     | 1:200           |
